# Supplementary material for: A temporal and spatial contribution of asparaginase to asparagine catabolism during development of rice grains
Source: PubMed Central journal article supplement (PMC5267587; doi:10.1186/s12284-017-0143-8), 2017-01-25

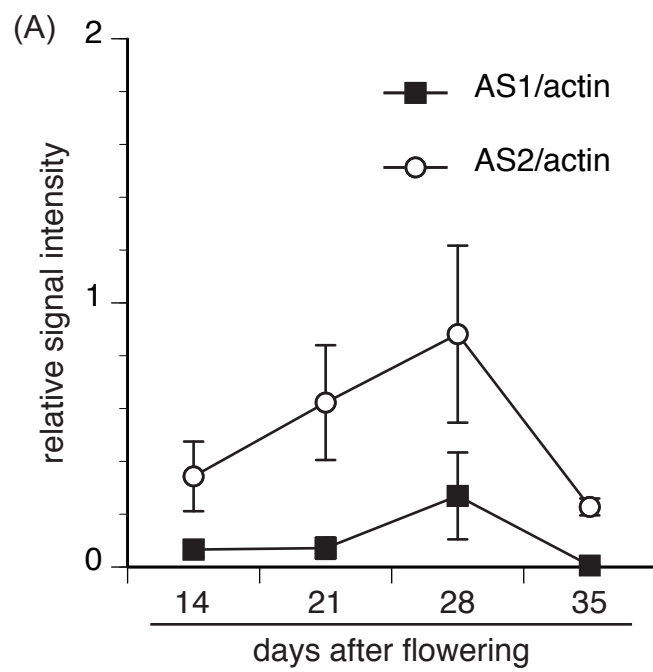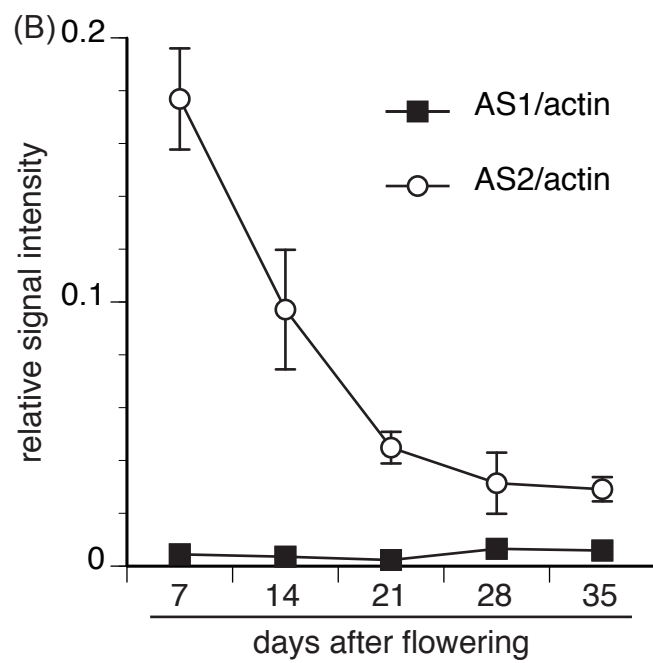

Supplement: 12284_2017_143_MOESM2_ESM.pdf [file 12284_2017_143_MOESM2_ESM.pdf]
